# Supplementary material
Source: PubMed Central journal article supplement (PMC4681099)
Supplement: NIHMS65452-supplement-Supplementary_Information.pdf [file NIHMS65452-supplement-Supplementary_Information.pdf]

## Additional MetaHIT consortium members:

Mathieu Almeida<sup>1,1a</sup>, Maria Antolin<sup>26</sup>, François Artiguenave<sup>22,23,24</sup>, Jean-Michel Batto<sup>1,1a</sup>, Marcelo Bertalan<sup>11</sup>, Hervé Blotière<sup>1,1a</sup>, Natalia Boruel<sup>26</sup>, Christian Brechot<sup>30</sup>, Thomas Bruls<sup>22,23,24</sup>, Kristoffer Burgdorf<sup>2</sup>, Francesc Casellas<sup>26</sup>, Antonella Cultrone<sup>1a</sup>, Willem M. de Vos<sup>12,16</sup>, Christine Delorme<sup>1a</sup>, Gérard Denariáz<sup>27</sup>, Muriel Derrien<sup>27</sup>, Rozenn Dervyn<sup>1a</sup>, Qiang Feng<sup>3</sup>, Niels Grarup<sup>2</sup>, Francisco Guarner<sup>26</sup>, Eric Guedon<sup>1a</sup>, Florence Haimet<sup>1,1a</sup>, Alexandre Jamet<sup>1a</sup>, Agnieska Juncker<sup>11</sup>, Catherine Juste<sup>1a</sup>, Sean Kennedy<sup>1,1a</sup>, Ghalia Khaci<sup>1a</sup>, Michiel Kleerebezem<sup>12</sup>, Jan Knoll<sup>28</sup>, Séverine Layec<sup>1a</sup>, Marion Leclerc<sup>1a</sup>, Pierre Leonard<sup>1,1a</sup>, Denis LePaslier<sup>22,23,24</sup>, Junhua Li<sup>3</sup>, Christine M'Rini<sup>30</sup>, Emmanuelle Maguin<sup>1a</sup>, Chaysavanh Manichanh<sup>26</sup>, Daniel Mende<sup>5,31</sup>, Alexandre Mérieux<sup>30</sup>, Raish Oozeer<sup>28</sup>, Julian Parkhill<sup>25</sup>, Eric Pelletier<sup>22,23,24</sup>, Nicolas Pons<sup>1,1a</sup>, Junjie Qin<sup>3</sup>, Simon Rasmussen<sup>11</sup>, Pierre Renault<sup>1a</sup>, Maria Rescigno<sup>29</sup>, Nicolas Sanchez<sup>1a</sup>, Thomas Sicheritz-Ponten<sup>11</sup>, Julien Tap<sup>27</sup>, Sebastian Tims<sup>12</sup>, Antonio Torrejon<sup>26</sup>, Keith Turner<sup>25</sup>, Maarten van de Guchte<sup>1a</sup>, Johan E.T. van Hylckama Vlieg<sup>27</sup>, Gaetana Vandemeulebrouck<sup>1a</sup>, Encarna Varela<sup>26</sup>, Patrick Viega<sup>27</sup>, Jean Weissenbach<sup>22,23,24</sup>, Yohan Winogradski<sup>1a</sup>, Takuji Yamada<sup>5</sup>, Erwin G. Zoetendal<sup>12</sup>

1 Institut National de la Recherche Agronomique, US1367 Metagenopolis

1a Institut National de la Recherche Agronomique, UMR14121 MICALIS

2 The Novo Nordisk Foundation Center for Basic Metabolic Research, Faculty of Health and Medical Sciences, University of Copenhagen, DK-2200 Copenhagen, Denmark

3 BGI-Shenzhen, Shenzhen517083, China

4a Department of Structural Biology, VIB, Pleinlaan2,1050 Brussels, Belgium

4b Department of Bioscience Engineering, Vrije Universiteit Brussel, Pleinlaan2,1050 Brussels, Belgium

5 European Molecular Biology Laboratory, Meyerhofstrasse1,69117 Heidelberg, Germany

6 Research Centre for Prevention and Health, Glostrup University Hospital, DK-2900 Glostrup, Denmark

7 Faculty of Health and Medical Sciences, University of Copenhagen, DK-2200 Copenhagen, Denmark

8 Institute of Public Health, Faculty of Medicine, University of Aalborg, DK-12130 Aalborg, Denmark

9 Department of Clinical Biochemistry, Vejle Hospital, DK-10130 Vejle, Denmark

10 Institute of Regional Health Research, University of Southern Denmark,DK-8200 Odense, Denmark

11 Center for Biological Sequence Analysis & Novo Nordisk Foundation Center for Biosustainability, Technical University of Denmark, DK-2800 Kongens Lyngby, Denmark

12 Laboratory of Microbiology, Wageningen University, The Netherlands

13 Faculty of Health Sciences, Aarhus University, Aarhus, Denmark

15 Department of Biology, Ole Maaløes Vej5, University of Copenhagen, DK-2200 Copenhagen, Denmark

16 Department of Bacteriology and Immunology, University of Helsinki, FIN-00014 Finland

17 Faculty of Health Sciences, University of Southern Denmark, DK-8200 Odense, Denmark

19 King Abdulaziz University, Jeddah, Saudi Arabia

20 Center for Sequencing Aarhus University, DK-8000 Aarhus C, Denmark

22 Commissariat à l'Energie Atomique, Genoscope, 91000 Evry, France

23 Centre National de la Recherche Scientifique, UMR8030, 91000

24 Evry, France, Université d'Evry Val d'Essonne 91000 Evry, France

25 The Wellcome Trust Sanger Institute, Hinxton, Cambridge CB101SA, UK

26 Digestive System Research Unit, University Hospital Vall d'Hebron, Ciberehd, 08035 Barcelona, Spain

27 Danone Research, 91120 Palaiseau, France

29 IEO - Istituto Europeo di Oncologia, Via Giuseppe Ripamonti, 435, 20141 Milano, Italy

28 Gut Biology & Microbiology, Danone Research, Centre for specialized nutrition, Wageningen, The Netherlands

30 Institut Mérieux,17 rue Burgelat,69002 Lyon, France.

31 Daniel K Inouye Center for Microbial Oceanography Research and Education (C-MORE), University of Hawai'i at Manoa, Honolulu, HI, USA
